# Supplementary material for: Effects of the Artificial Sweetener Neotame on the Gut Microbiome and Fecal Metabolites in Mice
Source: PubMed Central journal article supplement (PMC6017827; doi:10.3390/molecules23020367), 2018-02-09
Supplement: molecules-23-00367-s001.pdf [file molecules-23-00367-s001.pdf]

## **Supplemental Materials**

### **Effects of the Artificial Sweetener Neotame on the Gut Microbiome and Fecal Metabolites in Mice**

Liang Chi<sup>1</sup>, Xiaoming Bian<sup>2</sup>, Bei Gao<sup>2</sup>, Pengcheng Tu<sup>1</sup>, Yunjia Lai<sup>1</sup>, Hongyu Ru<sup>3</sup>, and Kun Lu<sup>1,\*</sup>

1. Department of Environmental Sciences and Engineering,

University of North Carolina at Chapel Hill, 27599, United States

2. Department of Environmental Health Science,

University of Georgia, Athens, Georgia 30602, United States

3. Department of Population Health and Pathobiology,

North Carolina State University, Raleigh, NC, 27607

\* Corresponding Authors

Email: kunlu@unc.edu

**Table S1. Significantly different gut bacteria genera between the control and 4-week neotame consumed mice**

| Taxa | Control mice       |          | Neotame-treated mice |          | Fold change | p- value |
|------|--------------------|----------|----------------------|----------|-------------|----------|
|      | Relative abundance | Variance | Relative abundance   | Variance |             |          |
| B1   | 0.0667             | 0.00130  | 0.1562               | 0.00196  | 2.343       | 0.0070   |
| B2   | 0.1402             | 0.00590  | 0.3195               | 0.00419  | 2.280       | 0.0035   |
| B3   | 0.0246             | 0.00048  | 0.0030               | 0.00000  | -8.088      | 0.0480   |
| B4   | 0.4130             | 0.01848  | 0.1988               | 0.00382  | -2.078      | 0.0112   |
| B5   | 0.0024             | 0.00001  | 0.0078               | 0.00001  | 3.180       | 0.0176   |
| B6   | 0.0014             | 0.00000  | 0.0007               | 0.00000  | -2.097      | 0.0307   |
| B7   | 0.0009             | 0.00000  | 0.0004               | 0.00000  | -2.214      | 0.0263   |
| B8   | 0.1068             | 0.00071  | 0.0504               | 0.00084  | -2.117      | 0.0115   |
| B9   | 0.0001             | 0.00000  | 0.0000               | 0.00000  | -           | 0.0196   |
| B10  | 0.0011             | 0.00000  | 0.0003               | 0.00000  | -3.390      | 0.0269   |
| B11  | 0.0065             | 0.00000  | 0.0042               | 0.00000  | -1.559      | 0.0474   |
| B12  | 0.0368             | 0.00010  | 0.0173               | 0.00005  | -2.128      | 0.0055   |
| B13  | 0.0190             | 0.00005  | 0.0101               | 0.00001  | -1.887      | 0.0276   |
| B14  | 0.0126             | 0.00002  | 0.0071               | 0.00001  | -1.759      | 0.0470   |
| B15  | 0.0006             | 0.00000  | 0.0001               | 0.00000  | -4.982      | 0.0027   |

\*The abbreviations of bacteria genus are listed as below (k, bacteria; p, phylum; c, class; o, order; f, family; g, genus):

- B1: k\_\_Bacteria;p\_\_Bacteroidetes;c\_\_Bacteroidia;o\_\_Bacteroidales;f\_\_Bacteroidaceae;g\_\_Bacteroides;  
 B2: k\_\_Bacteria;p\_\_Bacteroidetes;c\_\_Bacteroidia;o\_\_Bacteroidales;f\_\_S24-7;g\_\_Undefined;  
 B3: k\_\_Bacteria;p\_\_Deferribacteres;c\_\_Deferribacteres;o\_\_Deferribacterales;f\_\_Deferribacteraceae;  
 g\_\_Mucispirillum;  
 B4: k\_\_Bacteria;p\_\_Firmicutes;c\_\_Clostridia;o\_\_Clostridiales;f\_\_Undefined;g\_\_Undefined;  
 B5: k\_\_Bacteria;p\_\_Firmicutes;c\_\_Clostridia;o\_\_Clostridiales;f\_\_Clostridiaceae;  
 g\_\_CandidatusArthromitus;  
 B6: k\_\_Bacteria;p\_\_Firmicutes;c\_\_Clostridia;o\_\_Clostridiales;f\_\_Dehalobacteriaceae;  
 g\_\_Dehalobacterium;  
 B7: k\_\_Bacteria;p\_\_Firmicutes;c\_\_Clostridia;o\_\_Clostridiales;f\_\_Lachnospiraceae;g\_\_undefined;  
 B8: k\_\_Bacteria;p\_\_Firmicutes;c\_\_Clostridia;o\_\_Clostridiales;f\_\_Lachnospiraceae;g\_\_Undefined;  
 B9: k\_\_Bacteria;p\_\_Firmicutes;c\_\_Clostridia;o\_\_Clostridiales;f\_\_Lachnospiraceae;g\_\_Blautia;

B10: k\_\_Bacteria;p\_\_Firmicutes;c\_\_Clostridia;o\_\_Clostridiales;f\_\_Lachnospiraceae;g\_\_Dorea;  
B11: k\_\_Bacteria;p\_\_Firmicutes;c\_\_Clostridia;o\_\_Clostridiales;f\_\_Lachnospiraceae;g\_\_Ruminococcus;  
B12: k\_\_Bacteria;p\_\_Firmicutes;c\_\_Clostridia;o\_\_Clostridiales;f\_\_Ruminococcaceae;g\_\_Undefined;  
B13: k\_\_Bacteria;p\_\_Firmicutes;c\_\_Clostridia;o\_\_Clostridiales;f\_\_Ruminococcaceae;g\_\_Oscillospira;  
B14: k\_\_Bacteria;p\_\_Firmicutes;c\_\_Clostridia;o\_\_Clostridiales;f\_\_Ruminococcaceae;g\_\_Ruminococcus;  
B15: k\_\_Bacteria;p\_\_Firmicutes;c\_\_Clostridia;o\_\_Clostridiales;f\_\_Mogibacteriaceae;g\_\_Undefined.

**Supplemental Material, Table S2.** Identified significantly changed metabolites ( $p < 0.05$ , compared to controls) in fecal samples of neotame consumed mice.

| Metabolites            | Intensity (Control) | Intensity (Neotame) | Fold_change | p value |
|------------------------|---------------------|---------------------|-------------|---------|
| $\alpha$ -Tocopherol   | 17918.40            | 52139.20            | 2.91        | 0.0296  |
| 1,3-Dipalmitin         | 234277.16           | 470764.74           | 2.01        | 0.0001  |
| 7H-purine              | 128324.10           | 65536.59            | -1.96       | 0.0290  |
| Linoleic acid          | 659558.59           | 897080.28           | 1.36        | 0.0447  |
| 9H-Purine              | 291689.20           | 105043.81           | -2.78       | 0.0331  |
| Glycolic acid          | 321613.69           | 199950.60           | -1.61       | 0.0263  |
| Malic acid             | 291734.82           | 119909.72           | -2.43       | 0.0114  |
| Cholesterol            | 56759.19            | 102280.10           | 1.80        | 0.0267  |
| Mannose-6-phosphate    | 519338.44           | 106003.63           | -4.90       | 0.0434  |
| Arachidic acid         | 260462.63           | 111128.03           | -2.34       | 0.0173  |
| L-Glutamic acid        | 478500.28           | 168870.35           | -2.83       | 0.0142  |
| 1-Monopalmiti          | 11585.59            | 39277.09            | 3.39        | 0.0187  |
| inosine                | 116336.70           | 23775.23            | -4.89       | 0.0311  |
| L-Lysine               | 2339317.60          | 1563038.96          | -1.50       | 0.0419  |
| Pyroglutamic acid      | 15110123.85         | 7976423.88          | -1.89       | 0.0277  |
| Stearic acid           | 363923.99           | 786258.86           | 2.16        | 0.0025  |
| Valeric acid, 5-amino- | 630675.10           | 306205.50           | -2.06       | 0.0413  |
| Phosphoric acid        | 19315799.99         | 15441629.09         | -1.25       | 0.0031  |
| $\alpha$ -Cortolone    | 490875.08           | 290194.65           | -1.69       | 0.0245  |
| Glyceric acid          | 65657.38            | 34671.71            | -1.89       | 0.0021  |
| Uracil                 | 3646033.11          | 751739.04           | -4.85       | 0.0427  |
| Thymine                | 194232.78           | 137217.78           | -1.42       | 0.0245  |
| Serine                 | 108239.27           | 78871.60            | -1.37       | 0.0464  |
| Carbodiimide           | 464003.29           | 591278.67           | 1.27        | 0.0454  |
| Campesterol            | 20150.88            | 34516.50            | 1.71        | 0.0438  |
| Stigmastanol           | 33034.50            | 64170.00            | 1.94        | 0.0249  |
| Borane                 | 718135.59           | 1016476.69          | 1.42        | 0.0280  |
| beta-Sitosterol        | 45547.84            | 138507.52           | 3.04        | 0.0241  |
